# Supplementary material
Source: HighWire-hosted journal article supplement (https://bmjopen.bmj.com/content/8/5/e019385)
Supplement: inline-supplementary-material-3 [file inline-supplementary-material-3.pdf]

# Supplement 3

|         | Age groups | N    | Age  |      | BMI  |     | Systolic blood pressure (mmHg) |      | Diastolic blood pressure (mmHg) |      |
|---------|------------|------|------|------|------|-----|--------------------------------|------|---------------------------------|------|
|         |            |      | Mean | SD   | Mean | SD  | Mean                           | SD   | Mean                            | SD   |
| Men     | 25-29      | 175  | 27.2 | 1.39 | 26.6 | 5.2 | 123.1                          | 10.9 | 62.5                            | 9.4  |
|         | 30-34      | 182  | 32.1 | 1.40 | 27.1 | 4.3 | 122.3                          | 12.2 | 66.5                            | 9.8  |
|         | 35-39      | 291  | 37.2 | 1.39 | 26.8 | 3.5 | 121.8                          | 12.0 | 66.9                            | 9.4  |
|         | 40-44      | 457  | 42.2 | 1.44 | 28.0 | 4.4 | 124.5                          | 13.9 | 71.7                            | 10.4 |
|         | 45-49      | 453  | 47.0 | 1.43 | 27.8 | 4.2 | 123.3                          | 13.7 | 72.9                            | 10.2 |
|         | 50-54      | 453  | 52.0 | 1.46 | 28.5 | 4.1 | 125.9                          | 13.9 | 75.1                            | 10.3 |
|         | 55-59      | 477  | 57.0 | 1.42 | 28.4 | 4.4 | 129.2                          | 16.9 | 75.8                            | 10.6 |
|         | 60-64      | 469  | 61.9 | 1.39 | 28.8 | 4.4 | 131.8                          | 17.2 | 75.9                            | 10.4 |
|         | 65-69      | 320  | 66.6 | 1.39 | 28.7 | 4.7 | 134.9                          | 17.9 | 74.0                            | 9.9  |
| Total   |            | 3277 | 49.8 | 11.2 | 28.1 | 4.4 | 126.8                          | 15.5 | 72.6                            | 10.8 |
| Total * |            |      | 44.8 |      | 27.7 | 4.3 | 125.5                          | 13.9 | 70.7                            | 10.0 |
| Women   | 25-29      | 173  | 26.8 | 1.45 | 24.7 | 4.7 | 109.7                          | 10.9 | 62.3                            | 8.4  |
|         | 30-34      | 190  | 32.0 | 1.45 | 26.6 | 6.0 | 109.4                          | 11.4 | 64.7                            | 9.7  |
|         | 35-39      | 302  | 37.2 | 1.39 | 26.2 | 5.3 | 109.0                          | 11.2 | 66.3                            | 8.9  |
|         | 40-44      | 475  | 42.1 | 1.43 | 26.7 | 5.8 | 112.1                          | 11.6 | 68.2                            | 8.9  |
|         | 45-49      | 460  | 47.0 | 1.41 | 27.0 | 5.2 | 115.0                          | 13.8 | 70.2                            | 9.2  |
|         | 50-54      | 525  | 52.0 | 1.44 | 27.2 | 5.3 | 117.7                          | 15.6 | 72.2                            | 9.0  |
|         | 55-59      | 476  | 57.0 | 1.45 | 27.1 | 5.0 | 121.8                          | 17.7 | 72.9                            | 9.4  |
|         | 60-64      | 468  | 62.0 | 1.40 | 28.2 | 5.1 | 126.8                          | 17.5 | 73.0                            | 8.7  |
|         | 65-69      | 315  | 66.5 | 1.40 | 27.8 | 5.3 | 129.0                          | 17.2 | 72.3                            | 8.7  |
| Total   |            | 3384 | 49.6 | 11.2 | 27.0 | 5.3 | 117.8                          | 16.3 | 70.1                            | 9.5  |
| Total * |            |      | 44.9 |      | 26.7 | 5.3 | 115.5                          | 13.7 | 68.7                            | 9.0  |

\* Adjusted according to population age structure in 2010

table 1a Characteristics of the REFINE-Reykjavik study by age and sex. Continuous parameters.

|         |            | Age  |      |      | Total cholesterol (mmol/L) |      | High density lipoprotein (mmol/L) |      | Low density lipoprotein (mmol/L) |      | Triglycerides (mmol/L) |      |
|---------|------------|------|------|------|----------------------------|------|-----------------------------------|------|----------------------------------|------|------------------------|------|
|         | Age groups | N    | Mean | SD   | Mean                       | SD   | Mean                              | SD   | Mean                             | SD   | Mean                   | SD   |
| Men     | 25-29      | 175  | 27.2 | 1.39 | 4.56                       | 0.78 | 1.25                              | 0.27 | 2.77                             | 0.65 | 1.17                   | 0.63 |
|         | 30-34      | 182  | 32.1 | 1.40 | 5.00                       | 0.97 | 1.23                              | 0.28 | 3.15                             | 0.82 | 1.35                   | 1.07 |
|         | 35-39      | 291  | 37.2 | 1.39 | 5.08                       | 1.01 | 1.32                              | 0.30 | 3.21                             | 0.91 | 1.23                   | 0.97 |
|         | 40-44      | 457  | 42.2 | 1.44 | 5.32                       | 0.92 | 1.30                              | 0.31 | 3.41                             | 0.81 | 1.38                   | 0.87 |
|         | 45-49      | 453  | 47.0 | 1.43 | 5.38                       | 0.93 | 1.33                              | 0.34 | 3.44                             | 0.89 | 1.35                   | 0.79 |
|         | 50-54      | 453  | 52.0 | 1.46 | 5.39                       | 1.01 | 1.31                              | 0.34 | 3.44                             | 0.91 | 1.45                   | 0.85 |
|         | 55-59      | 477  | 57.0 | 1.42 | 5.37                       | 0.98 | 1.33                              | 0.36 | 3.40                             | 0.91 | 1.44                   | 0.87 |
|         | 60-64      | 469  | 61.9 | 1.39 | 5.22                       | 1.05 | 1.35                              | 0.34 | 3.26                             | 0.97 | 1.37                   | 0.73 |
|         | 65-69      | 320  | 66.6 | 1.39 | 5.05                       | 1.07 | 1.37                              | 0.38 | 3.10                             | 0.95 | 1.27                   | 0.64 |
| Total   |            | 3277 | 49.8 | 11.2 | 5.23                       | 1.00 | 1.32                              | 0.34 | 3.30                             | 0.91 | 1.36                   | 0.83 |
| Total * |            |      | 44.8 |      | 5.14                       | 0.96 | 1.30                              | 0.32 | 3.24                             | 0.86 | 1.33                   | 0.84 |
| Women   | 25-29      | 173  | 26.8 | 1.45 | 4.47                       | 0.86 | 1.59                              | 0.38 | 2.49                             | 0.77 | 0.86                   | 0.38 |
|         | 30-34      | 190  | 32.0 | 1.45 | 4.61                       | 0.86 | 1.50                              | 0.35 | 2.68                             | 0.76 | 0.94                   | 0.56 |
|         | 35-39      | 302  | 37.2 | 1.39 | 4.63                       | 0.79 | 1.57                              | 0.38 | 2.65                             | 0.75 | 0.90                   | 0.56 |
|         | 40-44      | 475  | 42.1 | 1.43 | 4.89                       | 0.86 | 1.58                              | 0.37 | 2.86                             | 0.78 | 0.97                   | 0.61 |
|         | 45-49      | 460  | 47.0 | 1.41 | 5.18                       | 0.94 | 1.64                              | 0.40 | 3.10                             | 0.87 | 0.98                   | 0.52 |
|         | 50-54      | 525  | 52.0 | 1.44 | 5.54                       | 0.97 | 1.70                              | 0.45 | 3.36                             | 0.93 | 1.09                   | 0.76 |
|         | 55-59      | 476  | 57.0 | 1.45 | 5.64                       | 0.97 | 1.66                              | 0.43 | 3.46                             | 0.90 | 1.14                   | 0.62 |
|         | 60-64      | 468  | 62.0 | 1.40 | 5.74                       | 1.06 | 1.67                              | 0.46 | 3.50                             | 0.99 | 1.24                   | 0.67 |
|         | 65-69      | 315  | 66.5 | 1.40 | 5.73                       | 0.99 | 1.74                              | 0.44 | 3.44                             | 0.91 | 1.22                   | 0.60 |
| Total   |            | 3384 | 49.6 | 11.2 | 5.27                       | 1.04 | 1.64                              | 0.42 | 3.15                             | 0.94 | 1.06                   | 0.63 |
| Total * |            |      | 44.9 |      | 5.09                       | 0.92 | 1.62                              | 0.40 | 3.01                             | 0.84 | 1.02                   | 0.58 |

\* Adjusted according to population age structure in 2010

[table 1b](#) Characteristics of the REFINE-Reykjavik study by age and sex. Continuous parameters.

|         |            | Family History of Myocardial Infraction |      |      | History of Cardiovascular Disease |      | History of Coronary Heart Disease |      |
|---------|------------|-----------------------------------------|------|------|-----------------------------------|------|-----------------------------------|------|
|         | Age groups | N                                       | N    | %    | N                                 | %    | N                                 | %    |
| Men     | 25-29      | 175                                     | 14   | 8.2  | 0                                 | 0    | 0                                 | 0    |
|         | 30-34      | 182                                     | 24   | 13.6 | 0                                 | 0    | 0                                 | 0    |
|         | 35-39      | 291                                     | 57   | 20.4 | 0                                 | 0    | 0                                 | 0    |
|         | 40-44      | 457                                     | 122  | 27.3 | 8                                 | 1.8  | 4                                 | 0.9  |
|         | 45-49      | 453                                     | 155  | 35.0 | 6                                 | 1.4  | 4                                 | 0.9  |
|         | 50-54      | 453                                     | 193  | 43.7 | 21                                | 4.9  | 19                                | 4.4  |
|         | 55-59      | 477                                     | 193  | 42.4 | 39                                | 8.4  | 35                                | 7.5  |
|         | 60-64      | 469                                     | 189  | 41.9 | 51                                | 11.1 | 40                                | 8.7  |
|         | 65-69      | 320                                     | 125  | 40.1 | 72                                | 22.9 | 64                                | 20.4 |
| Total   |            | 3277                                    | 1072 | 33.8 | 197                               | 6.2  | 166                               | 5.2  |
| Total * |            |                                         |      | 33.8 |                                   | 6.2  |                                   | 5.2  |
| Women   | 25-29      | 173                                     | 19   | 11.4 | 0                                 | 0    | 0                                 | 0    |
|         | 30-34      | 190                                     | 30   | 16.0 | 0                                 | 0    | 0                                 | 0    |
|         | 35-39      | 302                                     | 71   | 24.1 | 3                                 | 1.0  | 1                                 | 0.3  |
|         | 40-44      | 475                                     | 134  | 28.9 | 7                                 | 1.6  | 7                                 | 1.6  |
|         | 45-49      | 460                                     | 188  | 42.7 | 4                                 | 1.0  | 3                                 | 0.7  |
|         | 50-54      | 525                                     | 247  | 48.7 | 8                                 | 1.6  | 5                                 | 1.0  |
|         | 55-59      | 476                                     | 243  | 53.1 | 14                                | 3.1  | 10                                | 2.2  |
|         | 60-64      | 468                                     | 219  | 49.1 | 24                                | 5.5  | 18                                | 4.1  |
|         | 65-69      | 315                                     | 146  | 48.2 | 18                                | 6.0  | 13                                | 4.3  |
| Total   |            | 3384                                    | 1297 | 39.7 | 78                                | 2.4  | 57                                | 1.8  |
| Total * |            |                                         |      | 39.7 |                                   | 1.8  |                                   | 1.3  |

\*Adjusted according to population age structure in 2010

table 2a Characteristics of the REFINE-Reykjavik study by age and sex, categorical parameters.

|         |            | Diabetes<br>Type II |     |      | Statins |      | Hypertension |      | Medication for<br>Hypertension |      |
|---------|------------|---------------------|-----|------|---------|------|--------------|------|--------------------------------|------|
|         | Age groups | N                   | N   | %    | N       | %    | N            | %    | N                              | %    |
| Men     | 25-29      | 175                 | 0   | 0    | 0       | 0    | 17           | 9.7  | 1                              | 0.6  |
|         | 30-34      | 182                 | 0   | 0    | 0       | 0    | 18           | 9.9  | 6                              | 3.3  |
|         | 35-39      | 291                 | 2   | 0.7  | 0       | 0    | 27           | 9.3  | 10                             | 3.4  |
|         | 40-44      | 457                 | 11  | 2.4  | 15      | 3.3  | 87           | 19.0 | 25                             | 5.5  |
|         | 45-49      | 453                 | 19  | 4.2  | 16      | 3.5  | 112          | 24.7 | 68                             | 15.0 |
|         | 50-54      | 453                 | 22  | 4.9  | 62      | 13.7 | 181          | 40.0 | 121                            | 26.9 |
|         | 55-59      | 477                 | 48  | 10.1 | 84      | 17.7 | 231          | 48.4 | 170                            | 35.9 |
|         | 60-64      | 469                 | 50  | 10.7 | 125     | 26.7 | 272          | 58.0 | 210                            | 44.9 |
|         | 65-69      | 320                 | 46  | 14.4 | 108     | 33.8 | 228          | 71.3 | 182                            | 57.1 |
| Total   |            | 3277                | 198 | 6.0  | 410     | 12.5 | 1173         | 35.8 | 793                            | 24.3 |
| Total * |            |                     | 198 | 4.3  | 410     | 8.8  |              | 28.3 | 793                            | 17.9 |
| Women   | 25-29      | 173                 | 1   | 0.6  | 0       | 0    | 3            | 1.7  | 1                              | 0.6  |
|         | 30-34      | 190                 | 4   | 2.1  | 0       | 0    | 14           | 7.4  | 10                             | 5.3  |
|         | 35-39      | 302                 | 3   | 1.0  | 1       | 0.3  | 20           | 6.6  | 10                             | 3.3  |
|         | 40-44      | 475                 | 8   | 1.7  | 1       | 0.2  | 51           | 10.7 | 38                             | 8.0  |
|         | 45-49      | 460                 | 5   | 1.1  | 5       | 1.1  | 87           | 18.9 | 63                             | 13.8 |
|         | 50-54      | 525                 | 14  | 2.7  | 24      | 4.6  | 152          | 29.0 | 122                            | 23.2 |
|         | 55-59      | 476                 | 14  | 2.9  | 45      | 9.5  | 188          | 39.5 | 155                            | 32.6 |
|         | 60-64      | 468                 | 24  | 5.1  | 59      | 12.6 | 262          | 56.0 | 219                            | 46.8 |
|         | 65-69      | 315                 | 25  | 7.9  | 58      | 18.4 | 201          | 63.8 | 162                            | 51.4 |
| Total   |            | 3384                | 98  | 2.9  | 193     | 5.7  | 978          | 28.9 | 780                            | 23.1 |
| Total * |            |                     | 98  | 2.4  | 193     | 4.0  |              | 22.2 | 780                            | 17.4 |

\*Adjusted according to population age structure in 2010

table 2b Characteristics of the REFINE-Reykjavik study by age and sex, categorical parameters.

|        |            |         |      |        |      |         |      | BMI ≥25 |      | BMI ≥30 |      |
|--------|------------|---------|------|--------|------|---------|------|---------|------|---------|------|
|        |            | Smoking |      |        |      |         |      |         |      |         |      |
|        |            | Never   |      | Former |      | Current |      |         |      |         |      |
|        | Age groups | N       | %    | N      | %    | N       | %    | N       | %    | N       | %    |
| Men    | 25-29      | 87      | 51.2 | 34     | 20.0 | 49      | 28.8 | 100     | 57.1 | 28      | 16.0 |
|        | 30-34      | 84      | 47.2 | 49     | 27.5 | 45      | 25.3 | 121     | 66.5 | 34      | 18.7 |
|        | 35-39      | 171     | 60.0 | 57     | 20.0 | 57      | 20.0 | 197     | 67.7 | 42      | 14.4 |
|        | 40-44      | 196     | 43.3 | 151    | 33.3 | 106     | 23.4 | 357     | 78.1 | 110     | 24.1 |
|        | 45-49      | 170     | 37.8 | 170    | 37.8 | 110     | 24.4 | 334     | 73.7 | 115     | 25.4 |
|        | 50-54      | 160     | 35.6 | 196    | 43.7 | 93      | 20.7 | 370     | 81.7 | 147     | 32.4 |
|        | 55-59      | 153     | 32.7 | 221    | 47.2 | 94      | 20.1 | 382     | 80.1 | 155     | 32.5 |
|        | 60-64      | 137     | 29.6 | 236    | 51.0 | 90      | 19.4 | 378     | 80.6 | 159     | 33.9 |
|        | 65-69      | 89      | 28.3 | 169    | 53.8 | 56      | 17.8 | 259     | 80.9 | 105     | 32.8 |
| Total  |            | 1247    | 38.6 | 1283   | 39.7 | 700     | 21.7 | 2498    | 76.2 | 894     | 27.2 |
| Total* |            | 1247    | 42.1 | 1283   | 35.2 | 700     | 22.7 |         | 73   |         | 24.5 |
| Women  | 25-29      | 102     | 60.7 | 20     | 11.9 | 46      | 27.4 | 66      | 38.2 | 21      | 12.1 |
|        | 30-34      | 98      | 51.6 | 52     | 27.4 | 39      | 20.6 | 97      | 51.1 | 40      | 21.1 |
|        | 35-39      | 156     | 52.2 | 81     | 27.1 | 62      | 20.7 | 147     | 48.7 | 61      | 20.2 |
|        | 40-44      | 210     | 44.7 | 165    | 35.1 | 95      | 20.2 | 256     | 53.9 | 108     | 22.7 |
|        | 45-49      | 167     | 37.0 | 178    | 39.5 | 106     | 23.5 | 273     | 59.3 | 99      | 21.5 |
|        | 50-54      | 191     | 36.7 | 218    | 41.9 | 111     | 21.3 | 313     | 59.6 | 136     | 25.9 |
|        | 55-59      | 182     | 38.7 | 188    | 40.0 | 100     | 21.3 | 305     | 64.1 | 110     | 23.1 |
|        | 60-64      | 157     | 34.1 | 209    | 45.4 | 94      | 20.4 | 339     | 72.4 | 143     | 30.6 |
|        | 65-69      | 134     | 43.1 | 125    | 40.2 | 52      | 16.7 | 214     | 67.9 | 92      | 29.2 |
| Total  |            | 1397    | 41.9 | 1236   | 37.0 | 706     | 21.1 | 2010    | 59.4 | 810     | 23.9 |
| Total* |            | 1397    | 45.1 | 1236   | 33.2 | 706     | 21.7 |         | 55.8 |         | 22.2 |

\*Adjusted according to population age structure in 2010

**table 3a** Characteristics of the REFINE-Reykjavik study by age and sex. Categorical parameters (continuous)

|               |       | Cholesterol<br>≥5mmol/L |      | Cholesterol<br>≥6.2<br>mmol/L |      | Physical<br>activity ≥ 1<br>hours/week |      | Physical<br>activity ≥ 4<br>hours/week |      |
|---------------|-------|-------------------------|------|-------------------------------|------|----------------------------------------|------|----------------------------------------|------|
| Age<br>groups |       | N                       | %    | N                             | %    | N                                      | %    | N                                      | %    |
| Men           | 25-29 | 43                      | 24.6 | 4                             | 2.3  | 124                                    | 72.9 | 63                                     | 37.1 |
|               | 30-34 | 82                      | 45.1 | 15                            | 8.2  | 116                                    | 64.8 | 63                                     | 35.2 |
|               | 35-39 | 147                     | 50.5 | 39                            | 13.4 | 196                                    | 68.3 | 110                                    | 38.3 |
|               | 40-44 | 282                     | 61.7 | 73                            | 16.0 | 287                                    | 63.6 | 163                                    | 36.1 |
|               | 45-49 | 303                     | 66.9 | 68                            | 15.0 | 269                                    | 60.4 | 148                                    | 33.3 |
|               | 50-54 | 291                     | 64.2 | 89                            | 19.6 | 262                                    | 59.4 | 153                                    | 34.7 |
|               | 55-59 | 307                     | 64.4 | 95                            | 19.9 | 287                                    | 62.1 | 150                                    | 32.5 |
|               | 60-64 | 269                     | 57.4 | 77                            | 16.4 | 257                                    | 56.5 | 134                                    | 29.5 |
|               | 65-69 | 168                     | 52.5 | 45                            | 14.1 | 187                                    | 59.6 | 116                                    | 36.9 |
| Total         |       | 1892                    | 57.7 | 505                           | 15.4 | 1985                                   | 62.0 | 1100                                   | 34.3 |
| Total*        |       |                         | 53.5 |                               | 13.5 |                                        | 63.7 |                                        | 35.0 |
| Women         | 25-29 | 42                      | 24.3 | 6                             | 3.5  | 116                                    | 67.8 | 53                                     | 31.0 |
|               | 30-34 | 59                      | 31.1 | 5                             | 2.6  | 121                                    | 65.1 | 51                                     | 27.4 |
|               | 35-39 | 95                      | 31.5 | 10                            | 3.3  | 208                                    | 68.9 | 98                                     | 32.5 |
|               | 40-44 | 202                     | 42.5 | 37                            | 7.8  | 341                                    | 73.0 | 180                                    | 38.5 |
|               | 45-49 | 251                     | 54.6 | 60                            | 13.0 | 317                                    | 70.3 | 177                                    | 39.2 |
|               | 50-54 | 372                     | 70.9 | 124                           | 23.6 | 358                                    | 69.9 | 194                                    | 37.9 |
|               | 55-59 | 351                     | 73.7 | 126                           | 26.5 | 295                                    | 64.0 | 157                                    | 34.1 |
|               | 60-64 | 347                     | 74.1 | 141                           | 30.1 | 292                                    | 64.2 | 163                                    | 35.8 |
|               | 65-69 | 246                     | 78.1 | 95                            | 30.2 | 192                                    | 62.5 | 100                                    | 32.6 |
| Total         |       | 1965                    | 58.1 | 604                           | 17.8 | 2240                                   | 67.6 | 1173                                   | 35.4 |
| Total*        |       |                         | 50.6 |                               | 13.9 |                                        | 67.7 |                                        | 34.3 |

\*Adjusted according to population age structure in 2010

**table 3b** Characteristics of the REFINE-Reykjavik study by age and sex. Categorical parameters (continuous)

|         |            |      | Intima media thickness (mean) |      | Intima media thickness (max) |      | Moderate or more plaque in carotids |      |
|---------|------------|------|-------------------------------|------|------------------------------|------|-------------------------------------|------|
|         | Age groups | N    | Mean                          | SD   | Mean                         | SD   | N                                   | %    |
| Men     | 25-29      | 175  | 0.57                          | 0.07 | 0.67                         | 0.08 | 0                                   | 0.0  |
|         | 30-34      | 182  | 0.60                          | 0.07 | 0.71                         | 0.09 | 2                                   | 1.1  |
|         | 35-39      | 291  | 0.63                          | 0.09 | 0.74                         | 0.10 | 2                                   | 0.7  |
|         | 40-44      | 457  | 0.68                          | 0.08 | 0.80                         | 0.10 | 13                                  | 2.9  |
|         | 45-49      | 453  | 0.72                          | 0.09 | 0.85                         | 0.11 | 21                                  | 4.7  |
|         | 50-54      | 453  | 0.78                          | 0.11 | 0.91                         | 0.12 | 36                                  | 7.9  |
|         | 55-59      | 477  | 0.84                          | 0.12 | 0.98                         | 0.14 | 87                                  | 18.3 |
|         | 60-64      | 469  | 0.87                          | 0.12 | 1.01                         | 0.15 | 121                                 | 25.8 |
|         | 65-69      | 320  | 0.91                          | 0.13 | 1.06                         | 0.15 | 107                                 | 33.4 |
| Total   |            | 3277 | 0.76                          | 0.15 | 0.89                         | 0.17 | 389                                 | 11.9 |
| Total * |            |      | 0.71                          | 0.10 | 0.83                         | 0.11 |                                     | 8.3  |
| Women   | 25-29      | 173  | 0.53                          | 0.05 | 0.62                         | 0.06 | 0                                   | 0.0  |
|         | 30-34      | 190  | 0.57                          | 0.06 | 0.67                         | 0.08 | 1                                   | 0.5  |
|         | 35-39      | 302  | 0.60                          | 0.07 | 0.71                         | 0.08 | 2                                   | 0.7  |
|         | 40-44      | 475  | 0.64                          | 0.07 | 0.75                         | 0.08 | 7                                   | 1.5  |
|         | 45-49      | 460  | 0.68                          | 0.08 | 0.80                         | 0.10 | 18                                  | 3.9  |
|         | 50-54      | 525  | 0.74                          | 0.09 | 0.86                         | 0.11 | 29                                  | 5.5  |
|         | 55-59      | 476  | 0.78                          | 0.10 | 0.90                         | 0.12 | 53                                  | 11.2 |
|         | 60-64      | 468  | 0.83                          | 0.11 | 0.96                         | 0.13 | 82                                  | 17.5 |
|         | 65-69      | 315  | 0.85                          | 0.11 | 0.98                         | 0.12 | 85                                  | 27.0 |
| Total   |            | 3384 | 0.71                          | 0.13 | 0.83                         | 0.15 | 277                                 | 8.2  |
| Total * |            |      | 0.67                          | 0.08 | 0.79                         | 0.09 |                                     | 5.9  |

\*Adjusted according to population age structure in 2010

table 4a. Characteristics of the REFINE-Reykjavik study by age and sex, image analysis.

|         |            | Plaque categories |      |      |         |      |          |      |                |     |
|---------|------------|-------------------|------|------|---------|------|----------|------|----------------|-----|
|         | Age groups | N                 | None |      | Minimal |      | Moderate |      | Severe or more |     |
|         |            |                   | N    | %    | N       | %    | N        | %    | N              | %   |
| Men     | 25-29      | 175               | 163  | 94.2 | 10      | 5.8  | 0        | 0.0  | 0              | 0.0 |
|         | 30-34      | 182               | 157  | 86.3 | 23      | 12.6 | 2        | 1.1  | 0              | 0.0 |
|         | 35-39      | 291               | 257  | 88.3 | 32      | 11.0 | 2        | 0.7  | 0              | 0.0 |
|         | 40-44      | 457               | 310  | 68.0 | 133     | 29.2 | 13       | 2.9  | 0              | 0.0 |
|         | 45-49      | 453               | 260  | 57.6 | 170     | 37.7 | 20       | 4.4  | 1              | 0.2 |
|         | 50-54      | 453               | 194  | 42.8 | 223     | 49.2 | 35       | 7.7  | 1              | 0.2 |
|         | 55-59      | 477               | 141  | 29.6 | 248     | 52.1 | 80       | 16.8 | 7              | 1.5 |
|         | 60-64      | 469               | 107  | 22.8 | 241     | 51.4 | 107      | 22.8 | 14             | 3.0 |
|         | 65-69      | 320               | 50   | 15.6 | 163     | 50.9 | 91       | 28.4 | 16             | 5.0 |
| Total   |            | 3277              | 1639 | 50.1 | 1243    | 38.0 | 350      | 10.7 | 39             | 1.2 |
| Total * |            |                   |      | 60.9 |         | 30.8 |          | 7.6  |                | 0.8 |
| Women   | 25-29      | 173               | 167  | 96.5 | 6       | 3.5  | 0        | 0.0  | 0              | 0.0 |
|         | 30-34      | 190               | 176  | 92.6 | 13      | 6.8  | 1        | 0.5  | 0              | 0.0 |
|         | 35-39      | 302               | 268  | 88.7 | 32      | 10.6 | 2        | 0.7  | 0              | 0.0 |
|         | 40-44      | 475               | 365  | 76.8 | 103     | 21.7 | 7        | 1.5  | 0              | 0.0 |
|         | 45-49      | 460               | 308  | 67.1 | 133     | 29.0 | 17       | 3.7  | 1              | 0.2 |
|         | 50-54      | 525               | 292  | 55.7 | 203     | 38.7 | 28       | 5.3  | 1              | 0.2 |
|         | 55-59      | 476               | 216  | 45.5 | 206     | 43.4 | 49       | 10.3 | 4              | 0.8 |
|         | 60-64      | 468               | 157  | 33.5 | 229     | 48.9 | 70       | 15.0 | 12             | 2.6 |
|         | 65-69      | 315               | 68   | 21.6 | 162     | 51.4 | 70       | 22.2 | 15             | 4.8 |
| Total   |            | 3384              | 2017 | 59.7 | 1087    | 32.2 | 244      | 7.2  | 33             | 1.0 |
| Total * |            |                   |      | 68.5 |         | 25.6 |          | 5.3  |                | 0.7 |

\*Adjusted according to population age structure in 2010

table 4b. Characteristics of the REFINE-Reykjavik study by age and sex, image analysis.
