# Supplementary material
Source: HighWire-hosted journal article supplement (https://bmjopen.bmj.com/content/8/5/e019385)

Supplement 4 figure 1. Distribution of cardiovascular risk factors in the REFINE-Reykjavik study and Tromsø 6 study by age and sex.

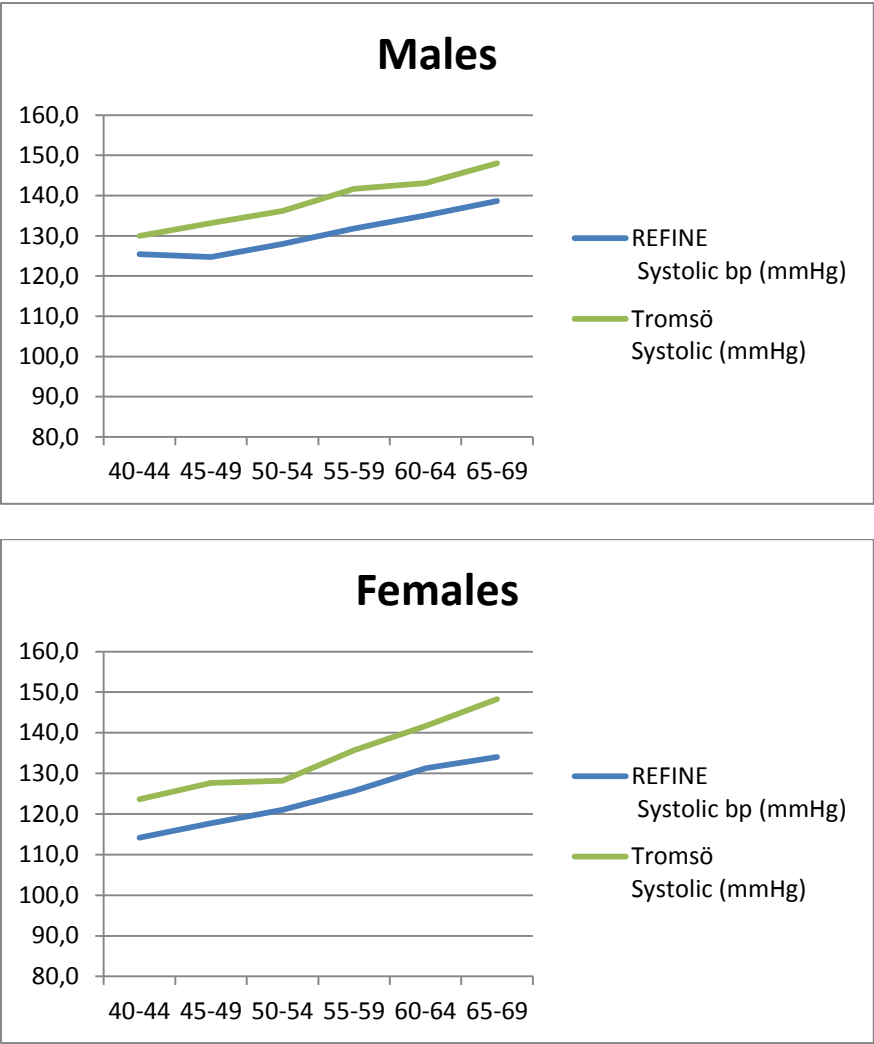

## Males

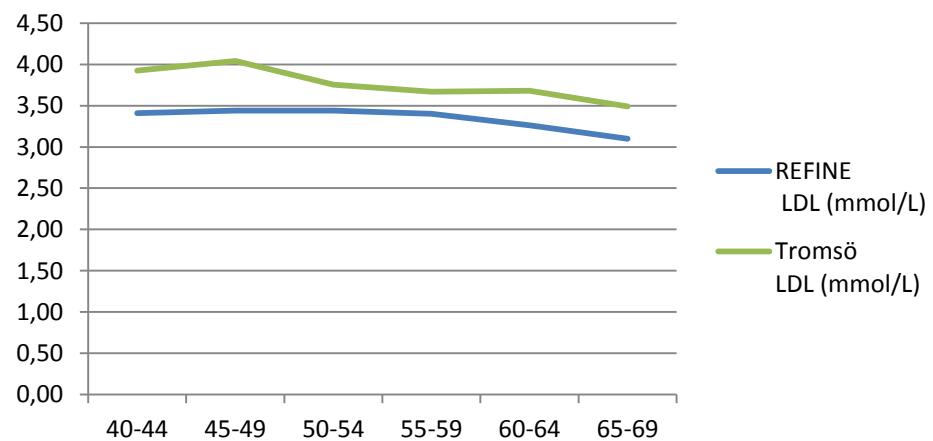

## Females

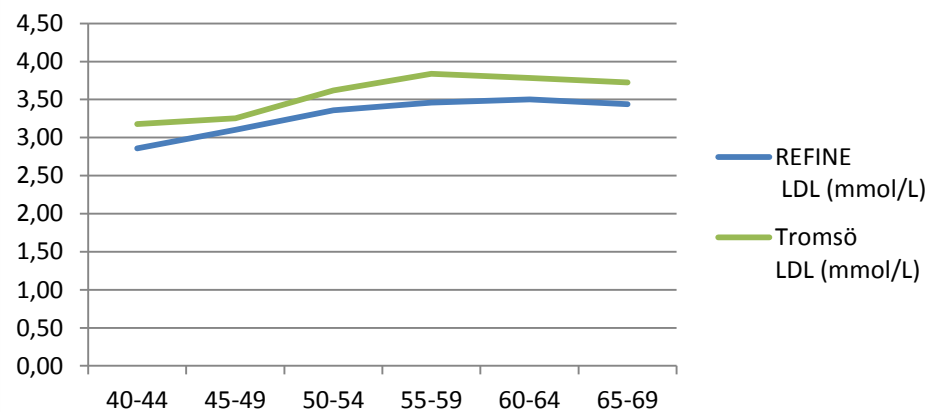

## Males

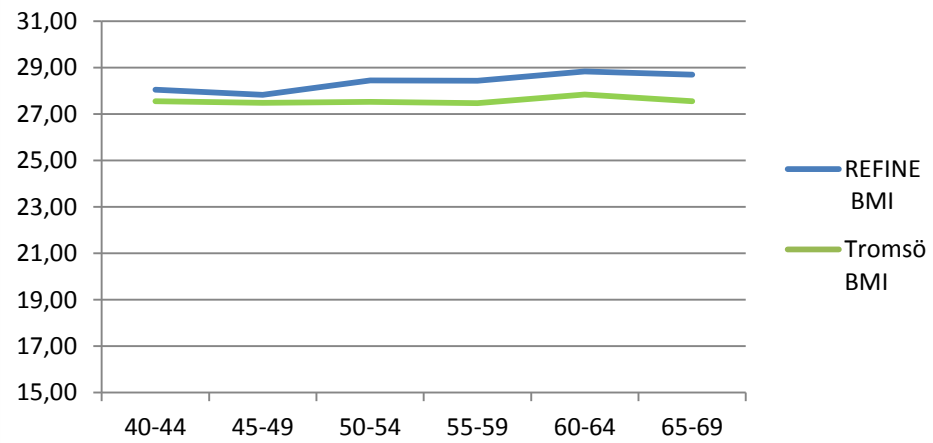

## Females

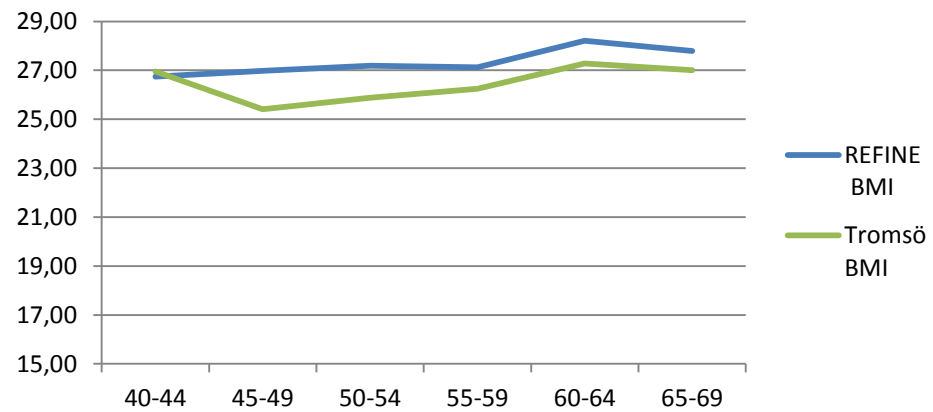

## Males

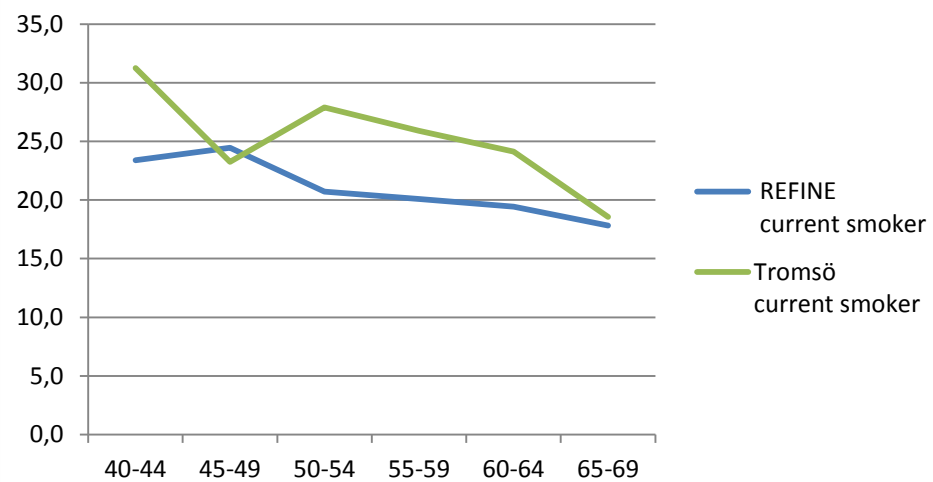

## Females

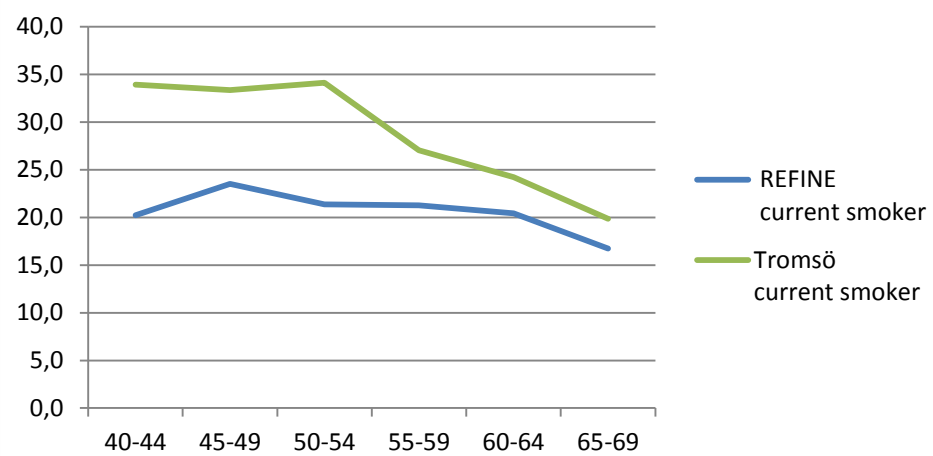

## Males

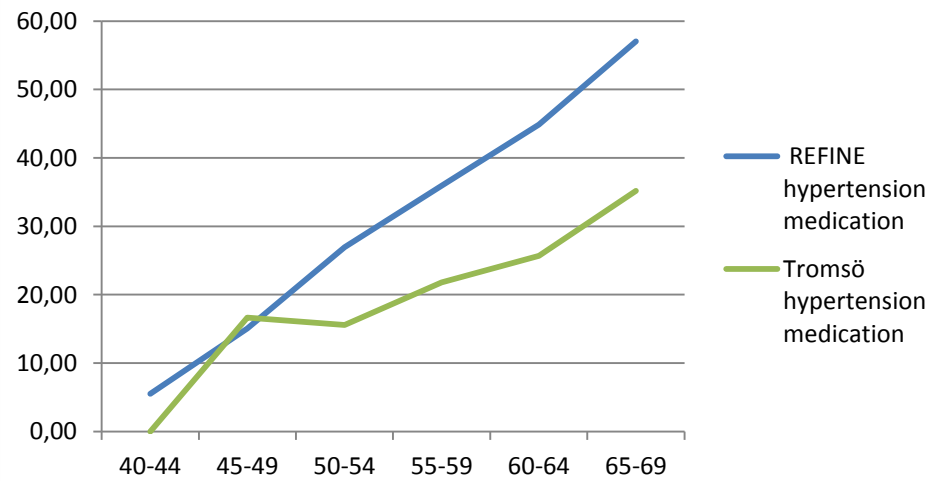

## Females

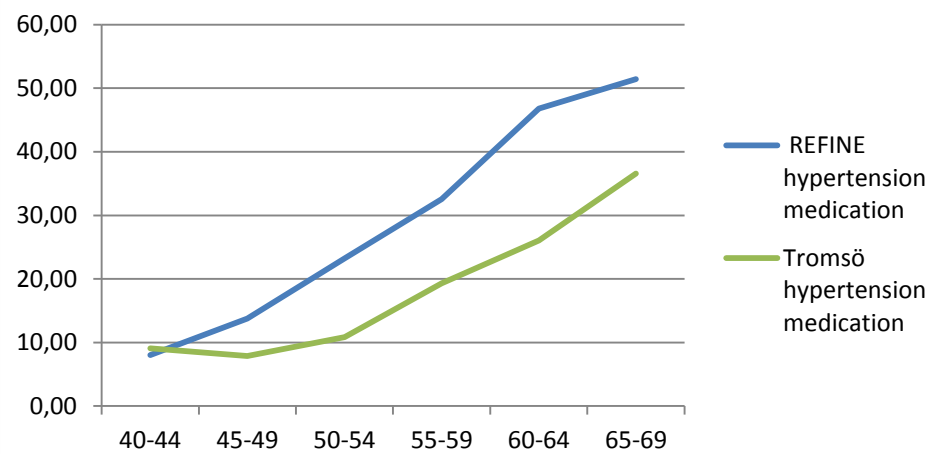

## Males

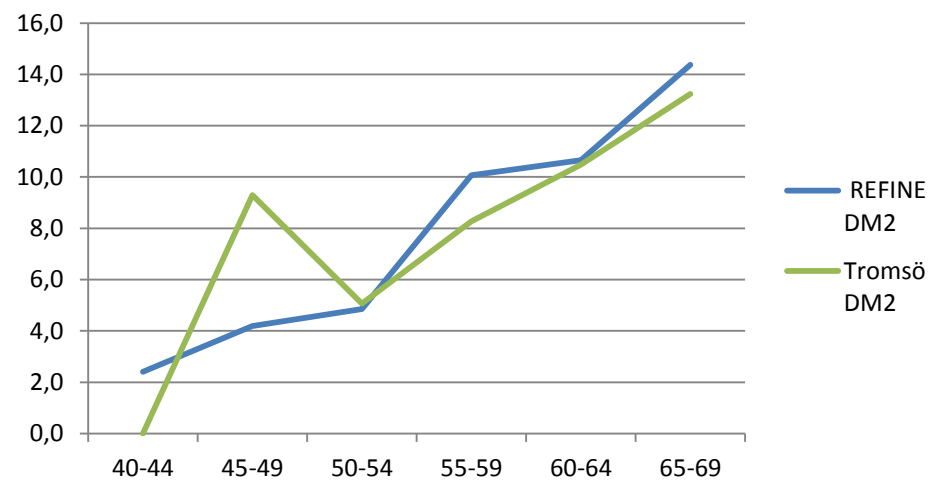

## Females

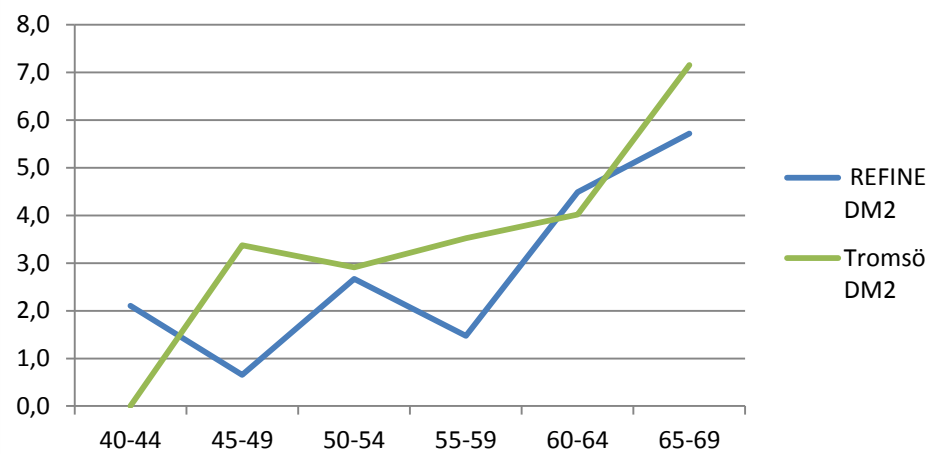

Supplement: inline-supplementary-material-4 [file inline-supplementary-material-4.pdf]
